# Supplementary material for: Development of Carvedilol-Loaded Albumin-Based Nanoparticles with Factorial Design to Optimize In Vitro and In Vivo Performance
Source: MDPI journal article supplement (doi:10.3390/pharmaceutics15051425), 2023-05-06
Supplement: s1 [file s1]

### Supplementary Materials

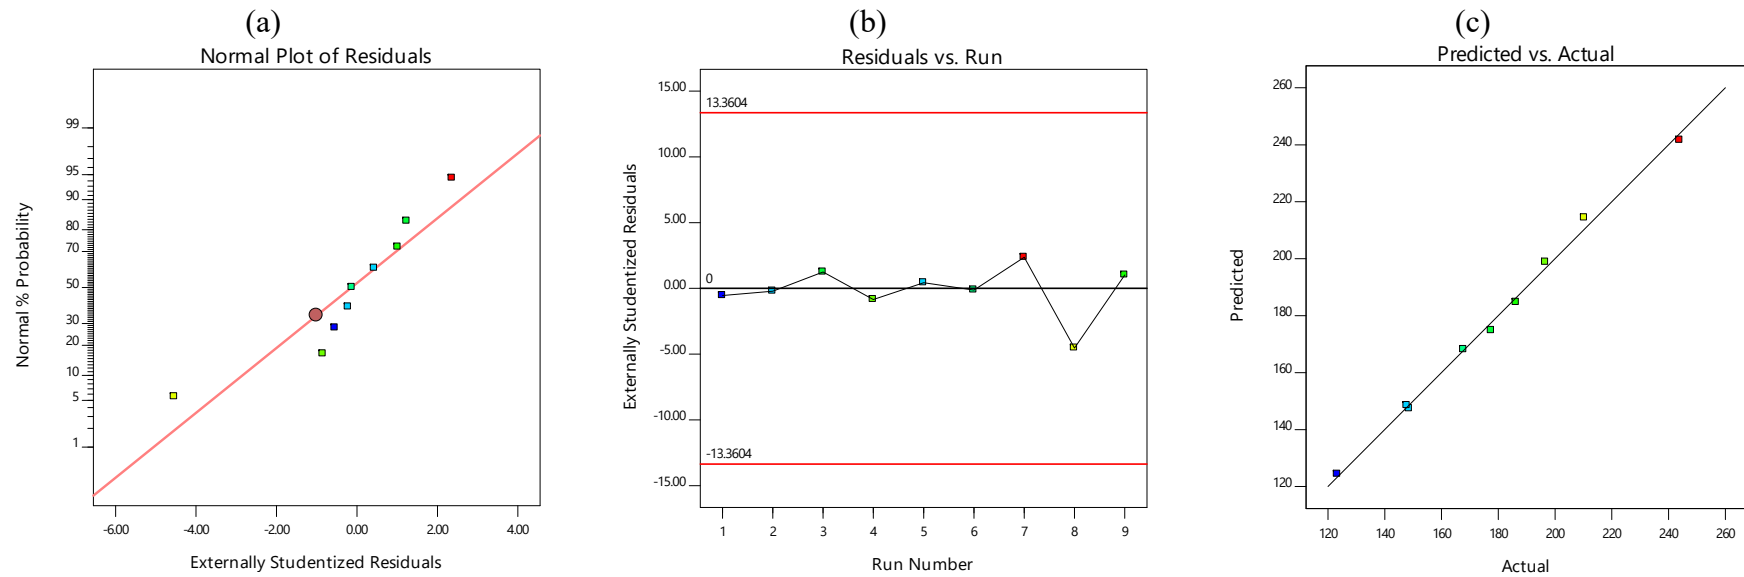

Figure S1: Model diagnostic plots of  $Y_1$  response including (a) normal plot of residuals (b) residuals versus runs plot (c) predicted versus actual values plot.

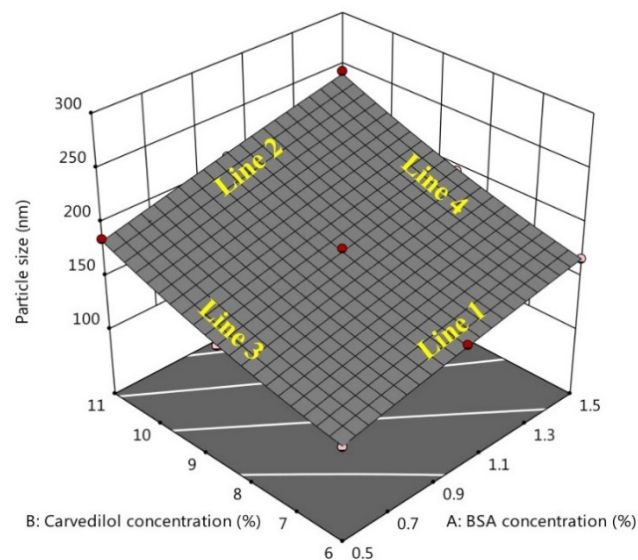

Figure S2: 3D response surface graph showing the effect of AB factor on  $Y_1$  response.

Figure S2 represents that the particle size was increased by increasing the BSA concentration at the lowest drug concentration (6%) and at the highest carvedilol (11%), showing parallelism of lines 1 and 2. Likewise, the two parallel lines 3 and 4 showed that the rate of increasing the particle size by means of increasing the carvedilol percentage from 6% to 11% was not significant at the lowest or the highest concentration of BSA, respectively. Therefore, there was no interaction between the two studied factors, which could be compatible with the Table 3 results where the interaction term (AB) exhibited a non-significant action ( $p = 0.1652$ ).

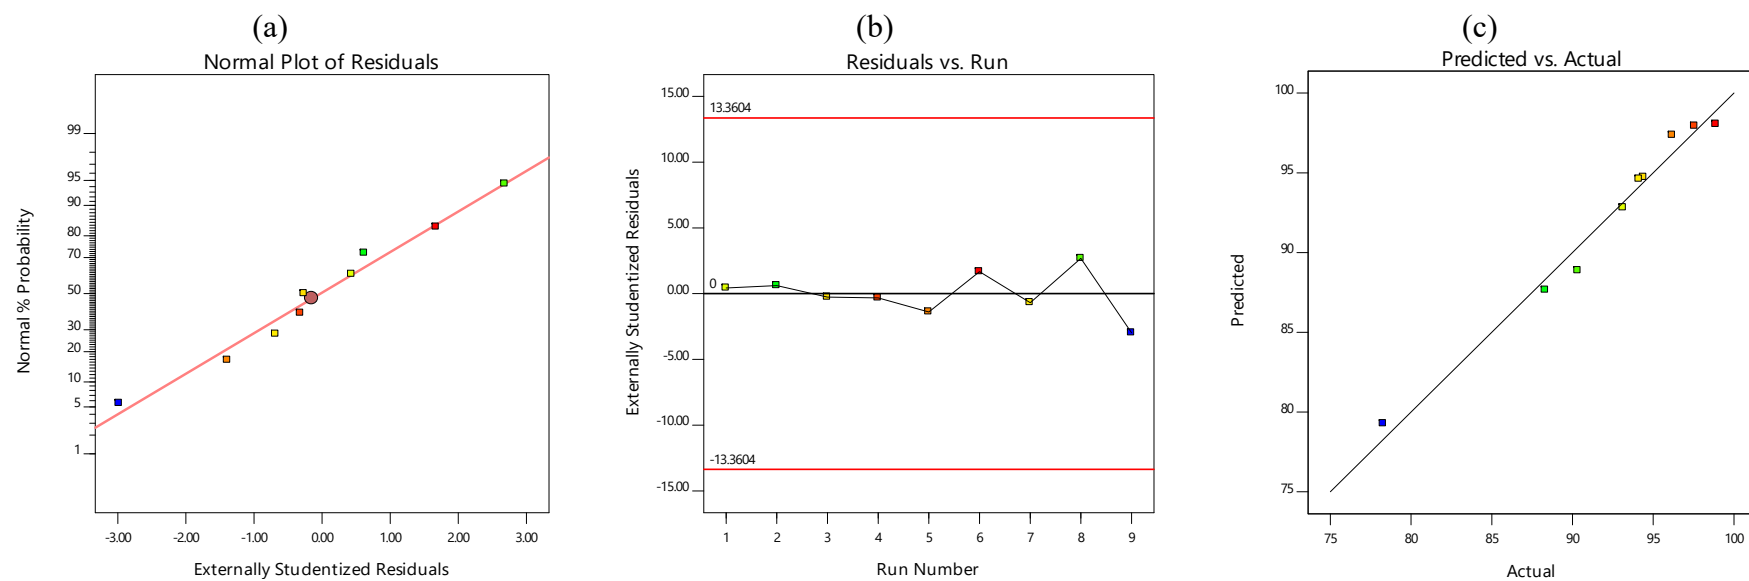

Figure S3: Model diagnostic plots of  $Y_2$  response including (a) normal plot of residuals (b) residuals versus runs plot (c) predicted versus actual values plot.

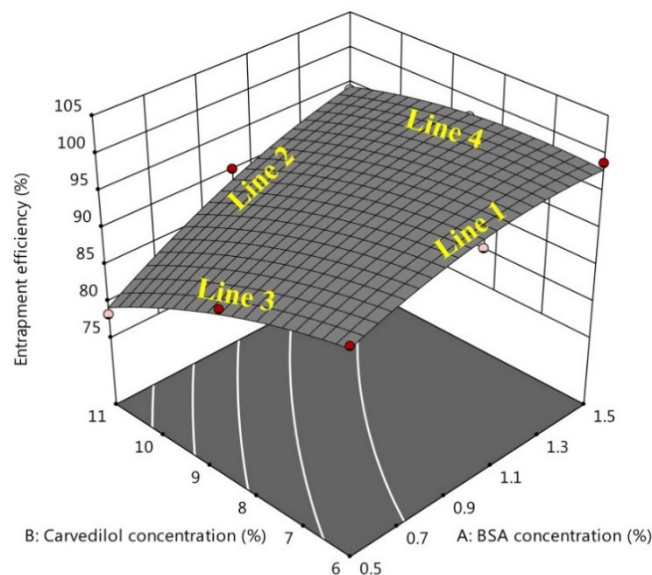

Figure S4: 3D response surface graph showing the effect of AB factor on Y<sub>2</sub> response.

As shown in Figure S4, it was observed that the increment rate of the entrapment of carvedilol in the BSA-based nanoparticles was significantly observed by increasing the BSA concentration and using the highest drug concentration (11%) when compared to the slighter increment in the drug entrapment induced by increasing the BSA concentration and using a lower drug concentration (6%). Moreover, the decrease in drug entrapment by increasing the drug percentage was remarkably monitored by using the lowest BSA concentration (0.5%) compared to the slight decrement in the drug entrapment exhibited by using the highest BSA concentration (1.5%). Thus, there was an obvious interaction effect between the A and B factors on the Y<sub>2</sub> response, as shown by the non-parallelism of each two opposite lines. This was in harmony with Table 3 results, where the term AB showed a significant effect with a p-value of 0.0394.

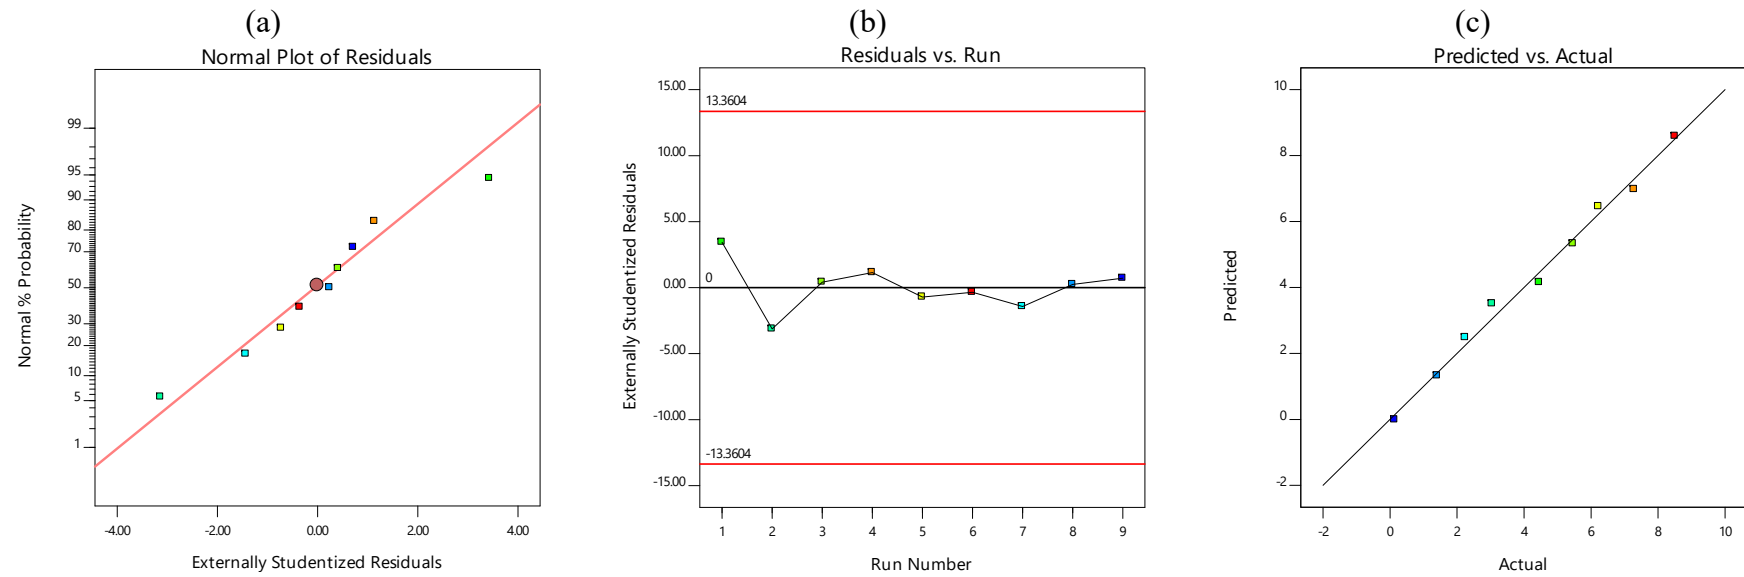

Figure S5: Model diagnostic plots of  $Y_3$  response including (a) normal plot of residuals (b) residuals versus runs plot (c) predicted versus actual values plot.

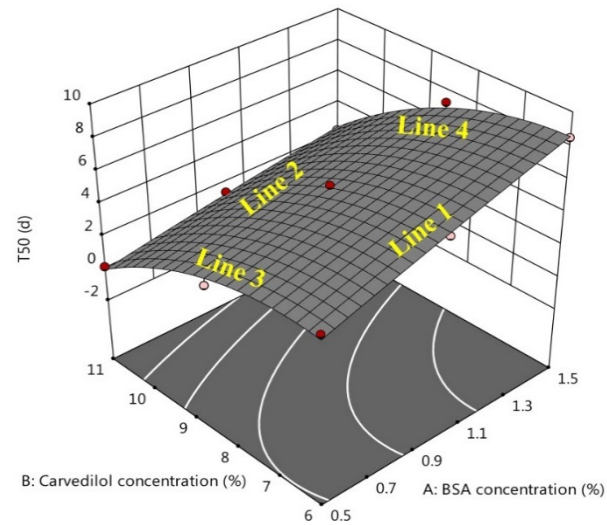

Figure S6: 3D response surface graph showing the effect of AB factor on  $Y_3$  response.

There was no interaction effect between the two factors on the  $Y_3$  response, where each two opposite lines were parallel to each other to a major extent. The absence of interaction could be supported by the Table 3 results, where the term AB showed an insignificant effect with a p-value of 0.2209.

Table S1: Results of PDI and zeta potential values of carvedilol-loaded nanoparticles.

| <b>Formulation</b> | <b>PDI</b>   | <b>Zeta potential (mV)</b> |
|--------------------|--------------|----------------------------|
| <b>F1</b>          | 0.417 ± 0.13 | -35.65 ± 1.21              |
| <b>F2</b>          | 0.382 ± 0.09 | -33.23 ± 1.10              |
| <b>F3</b>          | 0.399 ± 0.08 | -31.38 ± 0.39              |
| <b>F4</b>          | 0.387 ± 0.15 | -31.11 ± 0.91              |
| <b>F5</b>          | 0.431 ± 0.08 | -31.84 ± 1.01              |
| <b>F6</b>          | 0.489 ± 0.11 | -32.32 ± 1.50              |
| <b>F7</b>          | 0.409 ± 0.09 | -28.90 ± 0.78              |
| <b>F8</b>          | 0.457 ± 0.10 | -29.61 ± 0.97              |
| <b>F9</b>          | 0.495 ± 0.12 | -30.20 ± 0.56              |

PDI, poly dispersibity index; mV, millivolt.
